# Supplementary material for: The Different Impacts of Emissions and Meteorology on PM2.5 Changes in Various Regions in China: A Case Study
Source: MDPI journal article supplement (doi:10.3390/atmos13020222), 2022-01-28
Supplement: s1 [file s1]

## Supplementary Materials:

Wenjie Zhang <sup>1,2</sup>, Hong Wang <sup>2,\*</sup>, Xiaoye Zhang <sup>2</sup>, Yue Peng <sup>2</sup>, Zhaodong Liu <sup>2</sup>, Junting Zhong <sup>2</sup>, Yaqiang Wang <sup>2</sup>, Huizheng Che <sup>2</sup> and Yifan Zhao <sup>2</sup>

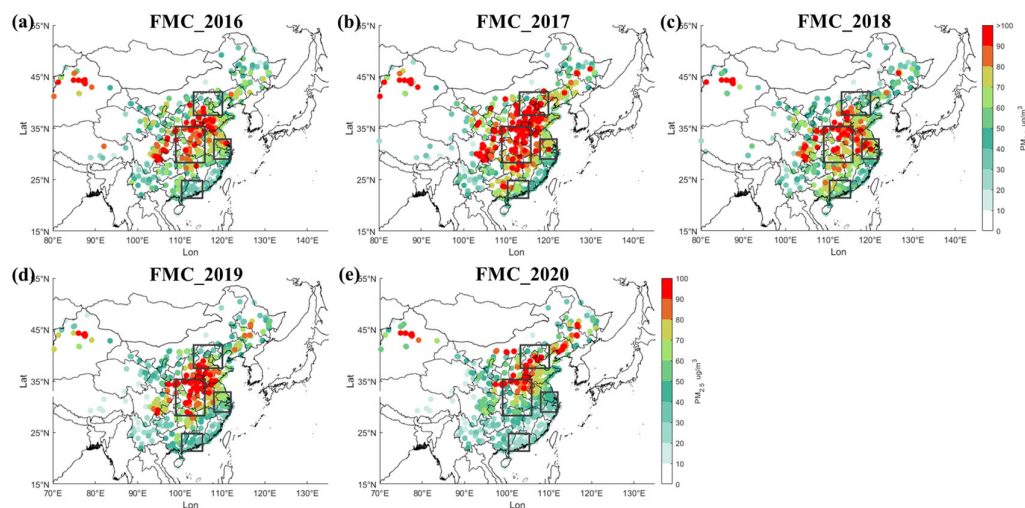

**Figure S1.** Distributions of monthly average PM<sub>2.5</sub> mass concentration (µg m<sup>-3</sup>) in China. (a) FMC\_2016. (b) FMC\_2017. (c) FMC\_2018. (d) FMC\_2019. (e) FMC\_2020.

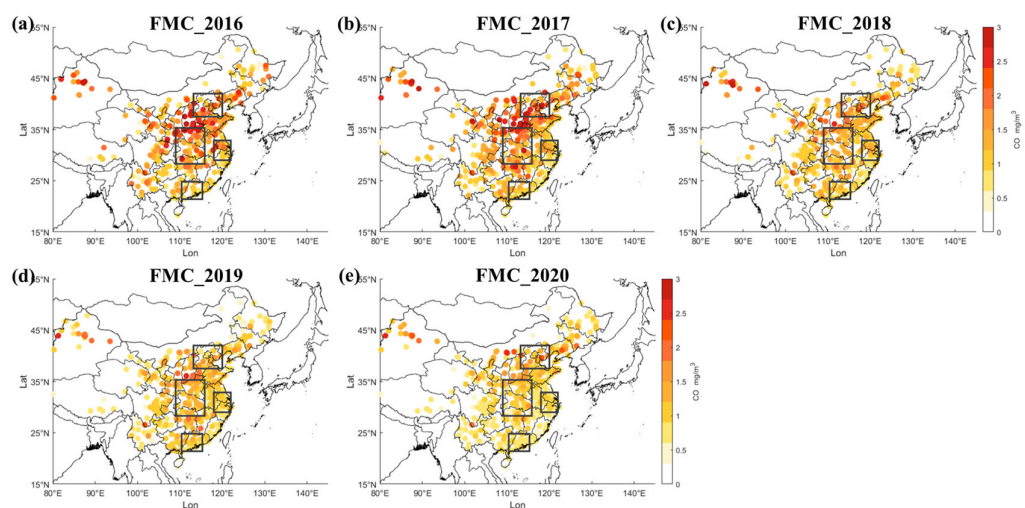

**Figure S2.** Distributions of monthly average CO mass concentration (mg m<sup>-3</sup>) in China. (a) FMC\_2016. (b) FMC\_2017. (c) FMC\_2018. (d) FMC\_2019. (e) FMC\_2020.

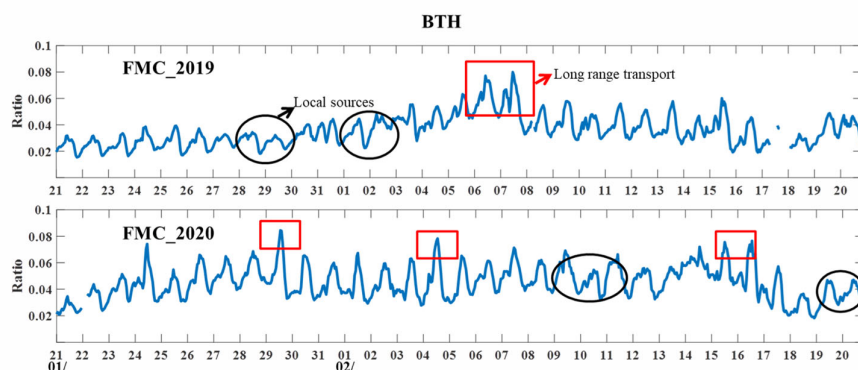

**Figure S3.** The values of CO/NO<sub>x</sub> during FMC\_2019 and FMC\_2020 in the BTH. The red rectangles represent long range transport of CO. The black ovals represent selected periods with similar meteorological conditions affected by local sources.

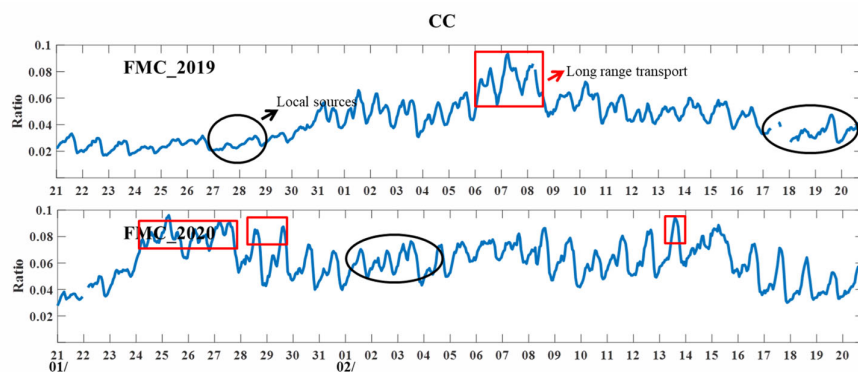

**Figure S4.** As in Figure S3, but in the CC.

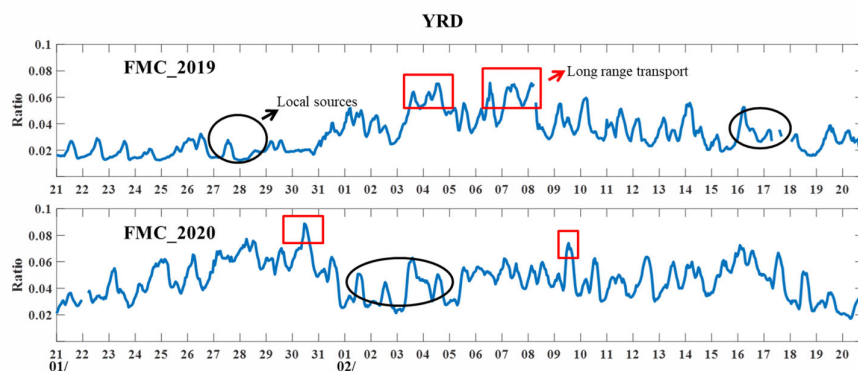

**Figure S5.** As in Figure S3, but in the YRD.

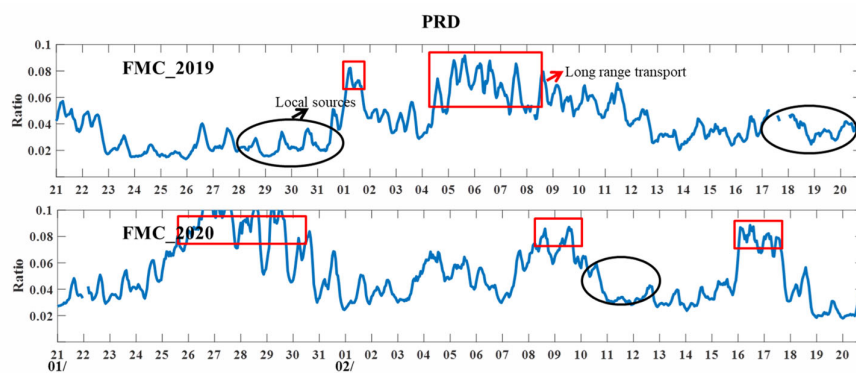

**Figure S6.** As in Figure S3, but in the PRD.
